# Supplementary material
Source: HighWire-hosted journal article supplement (https://bmjopenquality.bmj.com/highwire/filestream/136215/field_highwire_adjunct_files/0/ds6216.docx)

Graph 1: Percentage of missed calls with each PDSA cycle


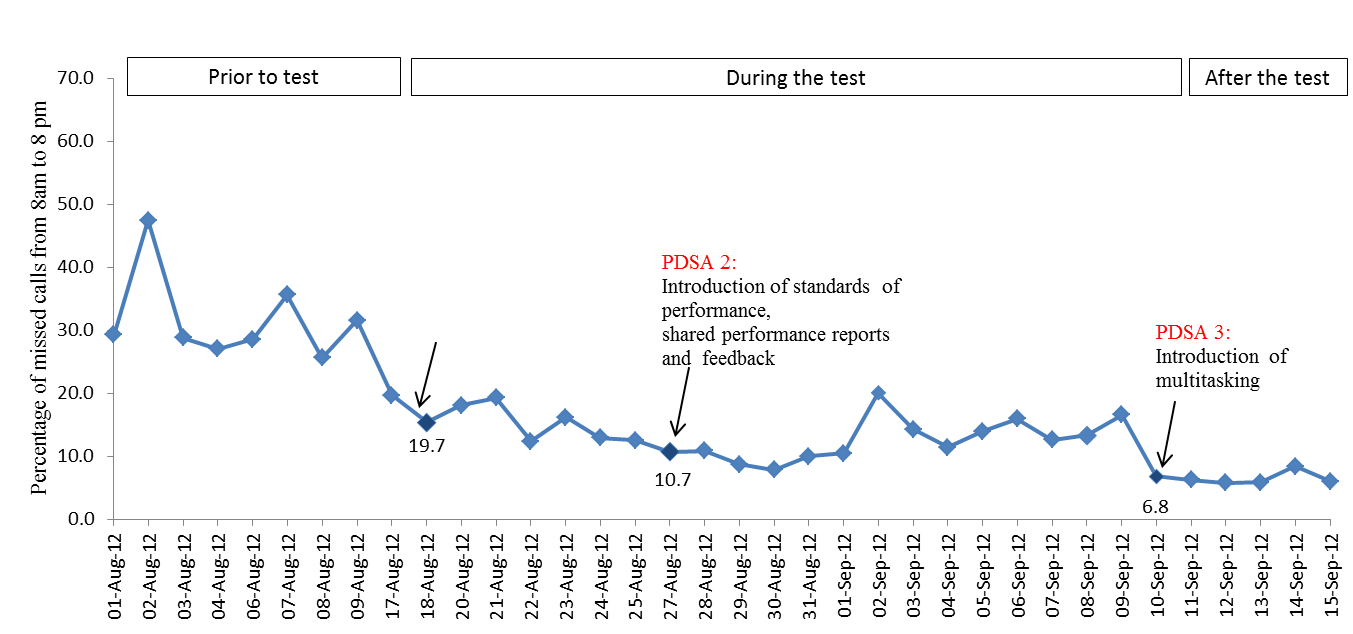


PDSA 1:

Introduction to log-in feature

Graph 2*:*  Percentage of missed calls for each month (June 2012 – June 2015)


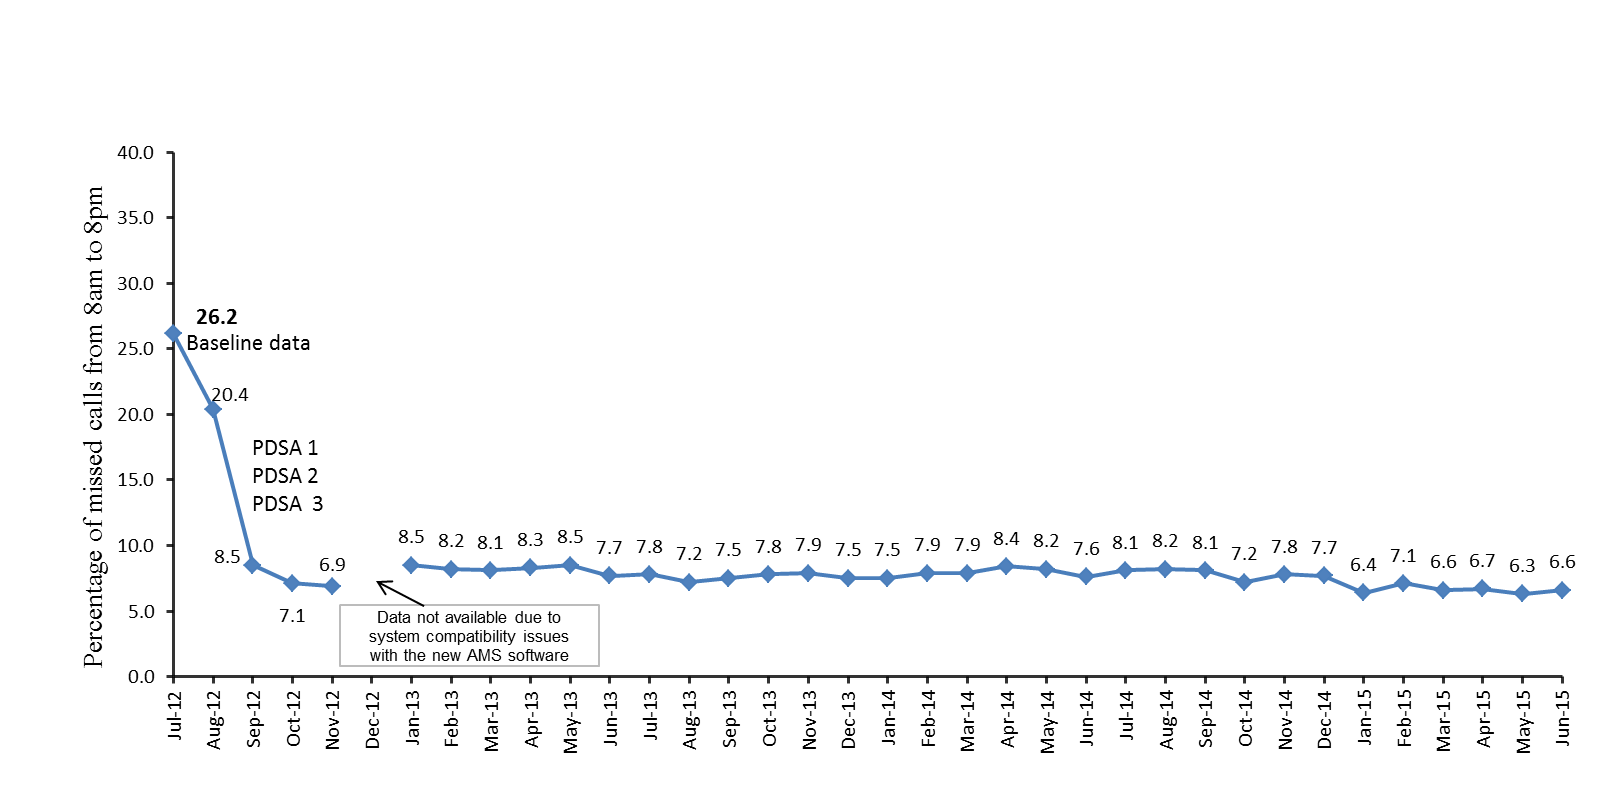

Supplement: ds6216.docx [file ds6216.docx]
